# Supplementary material for: A Neoglycoprotein-Immobilized Fluorescent Magnetic Bead Suspension Multiplex Array for Galectin-Binding Studies
Source: MDPI journal article supplement (doi:10.3390/molecules26206194), 2021-10-14

## Supporting Information

### A neoglycoprotein-immobilized fluorescent magnetic bead suspension multiplex array for galectin-binding studies

Libo Zhang<sup>1</sup>, Hai Yu<sup>1</sup>, Yuanyuan Bai<sup>1</sup>, Bijoyananda Mishra<sup>1</sup>, Xiaoxiao Yang<sup>1</sup>, Jing Wang<sup>1,2</sup>, Evan B. Yu<sup>1</sup>, Riyao Li<sup>1</sup>, and Xi Chen<sup>1\*</sup>

<sup>1</sup>Department of Chemistry, University of California, Davis, California, United States

<sup>2</sup>Key Laboratory of Experimental Marine Biology, Institute of Oceanology, Chinese Academy of Sciences, Qingdao, China

\*Correspondence: xiichen@ucdavis.edu; Tel.: 1-530-754-6037

#### Table of content

|                                                                                                                         |               |
|-------------------------------------------------------------------------------------------------------------------------|---------------|
| <b>Table S1.</b> The list of glycans, glycan-BSA conjugates, and bead region numbers.....                               | S2–S3         |
| <b>Reference</b> .....                                                                                                  | S3            |
| <b>Table S2.</b> Glycan valency dependence on the ratio of lactosyl squarate monoamide and BSA.....                     | S4            |
| <b>Figure S1.</b> RCA-I binding results using MagPlex beads immobilized with different amounts of Lac $\beta$ -BSA..... | S4            |
| <b>Figure S2.</b> MALDI-TOF analysis results of glycan-BSA conjugates.....                                              | S5–S7         |
| <b><sup>1</sup>H and <sup>13</sup>C{<sup>1</sup>H} NMR spectra of compounds 1–3, 15–18, 20, and 22.....</b>             | <b>S8–S16</b> |

**Table S1.** The list of glycans, glycan-BSA conjugates, and bead region numbers.

| Compound number | Glycan                                                                                | Ref.       | HRMS of glycan squarate                                                                                                       | Average glycan number per BSA | Beads Region number |
|-----------------|---------------------------------------------------------------------------------------|------------|-------------------------------------------------------------------------------------------------------------------------------|-------------------------------|---------------------|
| 1               | Glc $\alpha$ PropN <sub>3</sub>                                                       | This study | m/z: [M+Na] <sup>+</sup> Calcd for C <sub>15</sub> H <sub>23</sub> NO <sub>9</sub> Na 384.1271; found 384.1232                | 12                            | 64                  |
|                 |                                                                                       |            |                                                                                                                               | 35                            | 65                  |
| 2               | Glc $\beta$ PropN <sub>3</sub>                                                        | This study | m/z: [M+Na] <sup>+</sup> Calcd for C <sub>15</sub> H <sub>23</sub> NO <sub>9</sub> Na 384.1271; found 384.1256                | 6                             | 18                  |
|                 |                                                                                       |            |                                                                                                                               | 19                            | 15                  |
| 3               | Gal $\alpha$ PropN <sub>3</sub>                                                       | This study | m/z: [M+Na] <sup>+</sup> Calcd for C <sub>15</sub> H <sub>23</sub> NO <sub>9</sub> Na 384.1271; found 384.1234                | 10                            | 58                  |
|                 |                                                                                       |            |                                                                                                                               | 28                            | 61                  |
| 4               | Gal $\beta$ PropN <sub>3</sub>                                                        | [1]        | m/z: [M+Na] <sup>+</sup> Calcd for C <sub>15</sub> H <sub>23</sub> NO <sub>9</sub> Na 384.1271; found 384.1257                | 15                            | 20                  |
|                 |                                                                                       |            |                                                                                                                               | 24                            | 19                  |
| 5               | GlcNAc $\alpha$ PropN <sub>3</sub>                                                    | [2]        | m/z: [M+Na] <sup>+</sup> Calcd for C <sub>17</sub> H <sub>26</sub> N <sub>2</sub> O <sub>9</sub> Na 425.1536; found 425.1517  | 20                            | 51                  |
|                 |                                                                                       |            |                                                                                                                               | 27                            | 47                  |
| 6               | GlcNAc $\beta$ PropN <sub>3</sub>                                                     | [2]        | m/z: [M+Na] <sup>+</sup> Calcd for C <sub>17</sub> H <sub>26</sub> N <sub>2</sub> O <sub>9</sub> Na 425.1536; found 425.1496  | 11                            | 30                  |
|                 |                                                                                       |            |                                                                                                                               | 30                            | 29                  |
| 7               | GalNAc $\alpha$ PropN <sub>3</sub>                                                    | [3]        | m/z: [M+Na] <sup>+</sup> Calcd for C <sub>17</sub> H <sub>26</sub> N <sub>2</sub> O <sub>9</sub> Na 425.1536; found 425.1524  | 18                            | 46                  |
|                 |                                                                                       |            |                                                                                                                               | 26                            | 45                  |
| 8               | GalNAc $\beta$ PropN <sub>3</sub>                                                     | [3]        | m/z: [M+Na] <sup>+</sup> Calcd for C <sub>17</sub> H <sub>26</sub> N <sub>2</sub> O <sub>9</sub> Na 425.1536; found 425.1518  | 17                            | 22                  |
|                 |                                                                                       |            |                                                                                                                               | 28                            | 21                  |
| 9               | Gal $\beta$ 3GlcNAc $\alpha$ PropN <sub>3</sub>                                       | [4]        | m/z: [M+Na] <sup>+</sup> Calcd for C <sub>23</sub> H <sub>36</sub> N <sub>2</sub> O <sub>14</sub> Na 587.2064; found 587.2053 | 21                            | 35                  |
|                 |                                                                                       |            |                                                                                                                               | 42                            | 34                  |
| 10              | Gal $\beta$ 3GlcNAc $\beta$ PropN <sub>3</sub>                                        | [4]        | m/z: [M+Na] <sup>+</sup> Calcd for C <sub>23</sub> H <sub>36</sub> N <sub>2</sub> O <sub>14</sub> Na 587.2064; found 587.2057 | 16                            | 54                  |
|                 |                                                                                       |            |                                                                                                                               | 30                            | 52                  |
| 11              | Gal $\beta$ 3GalNAc $\alpha$ PropN <sub>3</sub>                                       | [4]        | m/z: [M+Na] <sup>+</sup> Calcd for C <sub>23</sub> H <sub>36</sub> N <sub>2</sub> O <sub>14</sub> Na 587.2064; found 587.2060 | 14                            | 77                  |
|                 |                                                                                       |            |                                                                                                                               | 29                            | 78                  |
| 12              | Gal $\beta$ 3GalNAc $\beta$ PropN <sub>3</sub>                                        | [4]        | m/z: [M+Na] <sup>+</sup> Calcd for C <sub>23</sub> H <sub>36</sub> N <sub>2</sub> O <sub>14</sub> Na 587.2064; found 587.2057 | 16                            | 42                  |
|                 |                                                                                       |            |                                                                                                                               | 24                            | 39                  |
| 13              | Gal $\beta$ 4Glc $\beta$ PropN <sub>3</sub><br>(Lac $\beta$ ProN <sub>3</sub> )       | [1, 3]     | m/z: [M+Na] <sup>+</sup> Calcd for C <sub>21</sub> H <sub>33</sub> NO <sub>14</sub> Na 546.1799; found 546.1753               | 12                            | 73                  |
|                 |                                                                                       |            |                                                                                                                               | 36                            | 74                  |
| 14              | Gal $\beta$ 4GlcNAc $\beta$ PropN <sub>3</sub><br>(LacNAc $\beta$ ProN <sub>3</sub> ) | [2]        | m/z: [M+Na] <sup>+</sup> Calcd for C <sub>23</sub> H <sub>36</sub> N <sub>2</sub> O <sub>14</sub> Na 587.2064; found 587.2044 | 6                             | 75                  |
|                 |                                                                                       |            |                                                                                                                               | 14                            | 76                  |
|                 |                                                                                       |            |                                                                                                                               | 18                            | 7                   |
|                 |                                                                                       |            |                                                                                                                               | 37                            | 36                  |
| 15              | Gal $\alpha$ 3Lac $\beta$ PropN <sub>3</sub><br>(iGb3)                                | This study | m/z: [M+Na] <sup>+</sup> Calcd for C <sub>27</sub> H <sub>43</sub> NO <sub>19</sub> Na 708.2327; found 708.2319               | 12                            | 44                  |
|                 |                                                                                       |            |                                                                                                                               | 19                            | 43                  |
| 16              | Gal $\alpha$ 3LacNAc $\beta$ PropN <sub>3</sub>                                       | This study | m/z: [M+Na] <sup>+</sup> Calcd for C <sub>29</sub> H <sub>46</sub> N <sub>2</sub> O <sub>19</sub> Na 749.2592; found 749.2559 | 8                             | 53                  |
|                 |                                                                                       |            |                                                                                                                               | 11                            | 55                  |
| 17              | Gal $\alpha$ 4Lac $\beta$ PropN <sub>3</sub><br>(Gb3)                                 | This study | m/z: [M+Na] <sup>+</sup> Calcd for C <sub>27</sub> H <sub>43</sub> NO <sub>19</sub> Na 708.2327; found 708.2338               | 9                             | 67                  |
|                 |                                                                                       |            |                                                                                                                               | 26                            | 72                  |
| 18              | Gal $\alpha$ 4LacNAc $\beta$ PropN <sub>3</sub>                                       | This study | m/z: [M+Na] <sup>+</sup> Calcd for C <sub>29</sub> H <sub>46</sub> N <sub>2</sub> O <sub>19</sub> Na 749.2592; found 749.2594 | 11                            | 38                  |
|                 |                                                                                       |            |                                                                                                                               | 15                            | 37                  |

|    |                                                                    |            |                                                                                                                               |    |    |
|----|--------------------------------------------------------------------|------------|-------------------------------------------------------------------------------------------------------------------------------|----|----|
| 19 | GlcNAc $\beta$ 3Lac $\beta$ PropN <sub>3</sub>                     | [5]        | m/z: [M+Na] <sup>+</sup> Calcd for C <sub>29</sub> H <sub>46</sub> N <sub>2</sub> O <sub>19</sub> Na 749.2592; found 749.2588 | 9  | 26 |
|    |                                                                    |            |                                                                                                                               | 16 | 25 |
| 20 | GalNAc $\beta$ 3Lac $\beta$ PropN <sub>3</sub>                     | This study | m/z: [M+Na] <sup>+</sup> Calcd for C <sub>29</sub> H <sub>46</sub> N <sub>2</sub> O <sub>19</sub> Na 749.2592; found 749.2586 | 9  | 67 |
|    |                                                                    |            |                                                                                                                               | 26 | 72 |
| 21 | GalNAc $\beta$ 4Lac $\beta$ PropN <sub>3</sub> (GA2)               | [6]        | m/z: [M+Na] <sup>+</sup> Calcd for C <sub>29</sub> H <sub>46</sub> N <sub>2</sub> O <sub>19</sub> Na 749.2592; found 749.2559 | 8  | 9  |
|    |                                                                    |            |                                                                                                                               | 14 | 8  |
| 22 | Gal $\beta$ 3GlcNAc $\beta$ 3Lac $\beta$ PropN <sub>3</sub> (LNT)  | This study | m/z: [M+Na] <sup>+</sup> Calcd for C <sub>35</sub> H <sub>56</sub> N <sub>2</sub> O <sub>24</sub> Na 911.3121; found 911.3041 | 6  | 63 |
|    |                                                                    |            |                                                                                                                               | 17 | 62 |
| 23 | Gal $\beta$ 3GalNAc $\beta$ 4Lac $\beta$ PropN <sub>3</sub> (GA1)  | [6]        | m/z: [M+Na] <sup>+</sup> Calcd for C <sub>35</sub> H <sub>56</sub> N <sub>2</sub> O <sub>24</sub> Na 911.3121; found 911.3101 | 7  | 13 |
|    |                                                                    |            |                                                                                                                               | 22 | 12 |
| 24 | Gal $\beta$ 4GlcNAc $\beta$ 3Lac $\beta$ PropN <sub>3</sub> (LNnT) | [5]        | m/z: [M+Na] <sup>+</sup> Calcd for C <sub>35</sub> H <sub>56</sub> N <sub>2</sub> O <sub>24</sub> Na 911.3121; found 911.3103 | 9  | 28 |
|    |                                                                    |            |                                                                                                                               | 20 | 27 |

## References:

1. Yu, H.; Chokhawala, H.; Karpel, R.; Yu, H.; Wu, B.; Zhang, J.; Zhang, Y.; Jia, Q.; Chen, X. A multifunctional *Pasteurella multocida* sialyltransferase: a powerful tool for the synthesis of sialoside libraries. *J. Am. Chem. Soc.* **2005**, *127*, 17618-17619, doi:10.1021/ja0561690.
2. Lau, K.; Thon, V.; Yu, H.; Ding, L.; Chen, Y.; Muthana, M. M.; Wong, D.; Huang, R.; Chen, X. Highly efficient chemoenzymatic synthesis of beta1-4-linked galactosides with promiscuous bacterial beta1-4-galactosyltransferases. *Chem. Commun.* **2010**, *46*, 6066-6068, doi:10.1039/c0cc01381a.
3. Yu, H.; Huang, S.; Chokhawala, H.; Sun, M.; Zheng, H.; Chen, X. Highly efficient chemoenzymatic synthesis of naturally occurring and non-natural alpha-2,6-linked sialosides: a *P. damsela* alpha-2,6-sialyltransferase with extremely flexible donor-substrate specificity. *Angew. Chem. Int. Ed. Engl.* **2006**, *45*, 3938-3944, doi:10.1002/anie.200600572.
4. Yu, H.; Thon, V.; Lau, K.; Cai, L.; Chen, Y.; Mu, S.; Li, Y.; Wang, P. G.; Chen, X. Highly efficient chemoenzymatic synthesis of beta1-3-linked galactosides. *Chem. Commun.* **2010**, *46*, 7507-7509, doi:10.1039/c0cc02850a.
5. Yu, H.; Zeng, J.; Li, Y.; Thon, V.; Shi, B.; Chen, X. Effective one-pot multienzyme (OPME) synthesis of monotreme milk oligosaccharides and other sialosides containing 4-O-acetyl sialic acid. *Org. Biomol. Chem.* **2016**, *14*, 8586-8597, doi:10.1039/c6ob01706a.
6. Yang, X.; Yu, H.; Yang, X.; Kooner, A. S.; Luu, B.; Chen, X. One-pot multienzyme (OPME) chemoenzymatic synthesis of brain ganglioside glycans with human ST3GAL II expressed in *E. coli*. Submitted.

**Table S2.** Glycan valency (average number of glycans per BSA molecule) dependence on the ratio of lactosyl squarate monoamide and BSA. Conditions used: 2 mg/mL BSA was incubated with different ratios (20:1 to 100:1) of lactosyl squarate monoamide at room temperature for 20 h with shaking (850 rpm).

| Lactoside:BSA ratio | Glycan valency |
|---------------------|----------------|
| 20:1                | 12             |
| 40:1                | 20             |
| 60:1                | 28             |
| 80:1                | 32             |
| 100:1               | 36             |

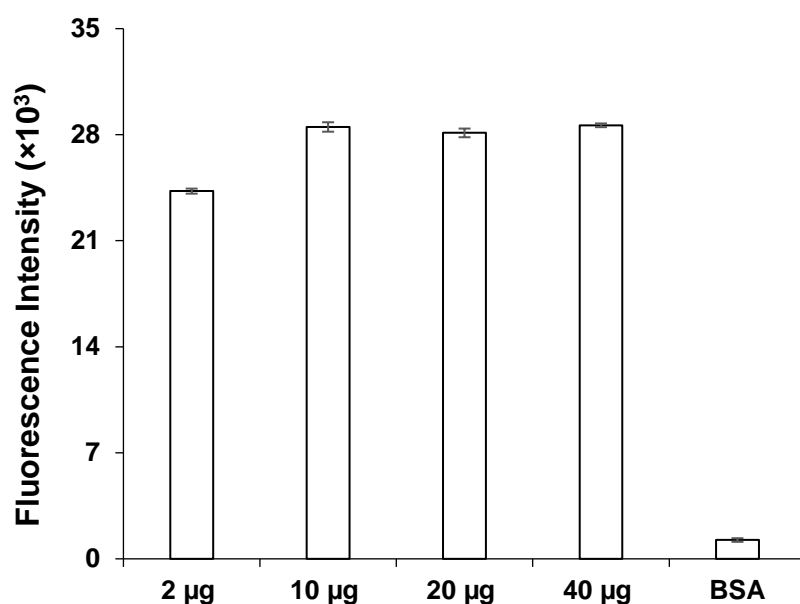

**Figure S1.** RCA-I binding results using MagPlex beads immobilized with different amounts of Lacβ-BSA. Different amounts of Lacβ-BSA with a valency of 36 glycan per BSA molecule were incubated with 25 μL ( $0.3 \times 10^6$  beads) of EDC/NHS-activated MagPlex beads (Region numbers 7, 8, 12, 13 for 2, 10, 20, 40 μg Lacβ-BSA respectively) at room temperature for 2 h. BSA (10 μg) immobilized (Region number 44) under the same condition was used as a control. RCA-I (15 μg/mL) was used in PBS+0.2% BSA as the binding buffer and PBS+0.1% Tween 20 was used as the washing buffer in the assay.

**Glc $\alpha$ -BSA**

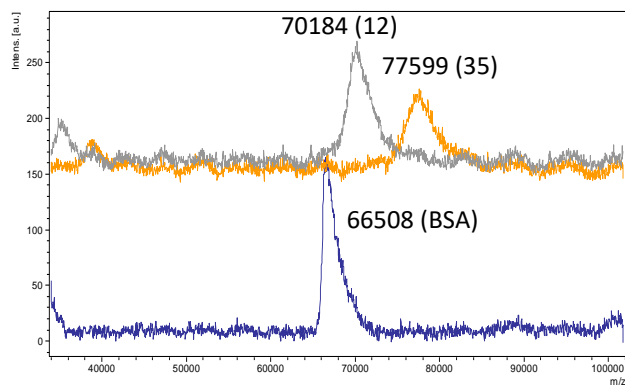

**Glc $\beta$ -BSA**

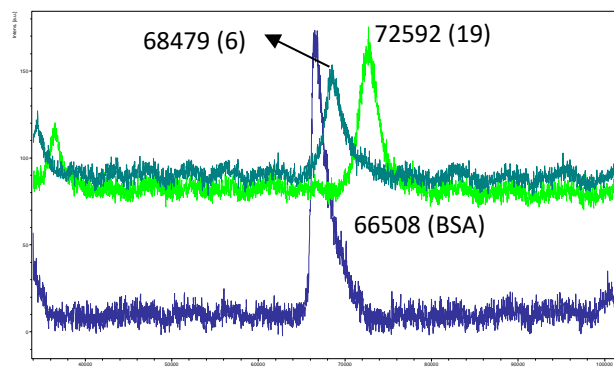

**Gal $\alpha$ -BSA**

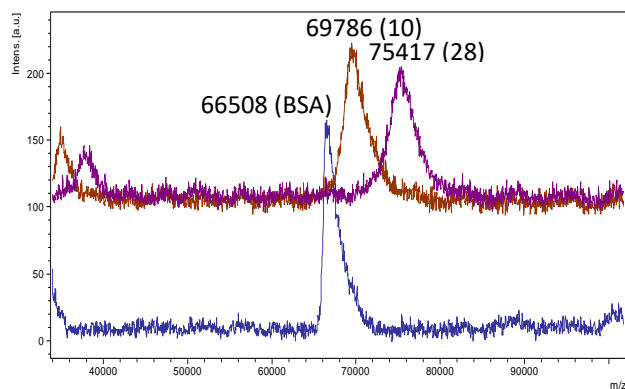

**Gal $\beta$ -BSA**

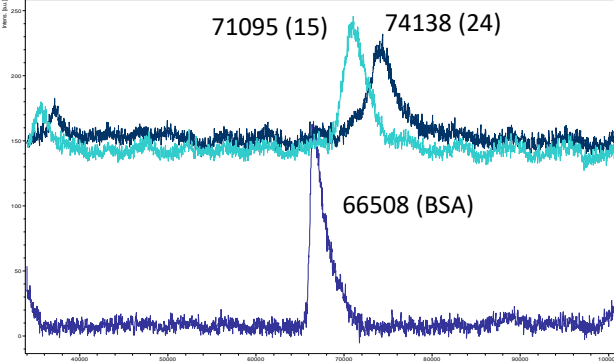

**GlcNAc $\alpha$ -BSA**

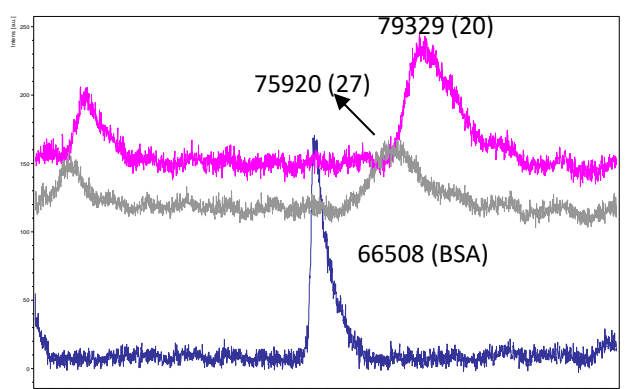

**GlcNAc $\beta$ -BSA**

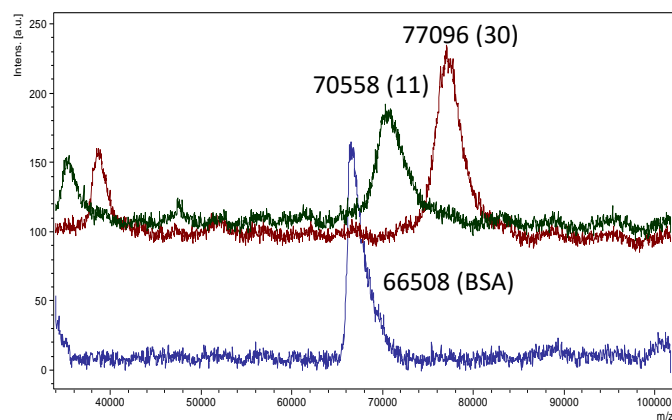

**GalNAc $\alpha$ -BSA**

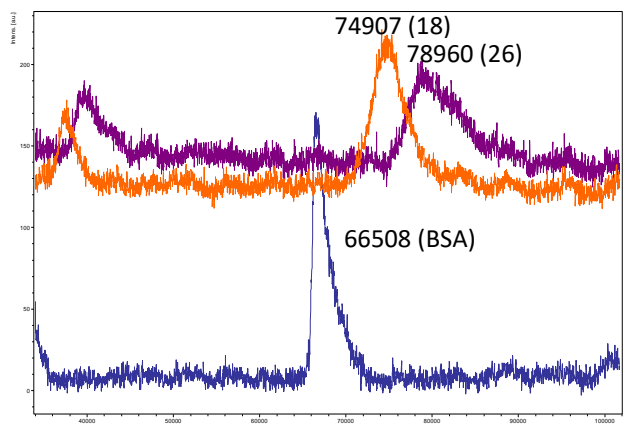

**GalNAc $\beta$ -BSA**

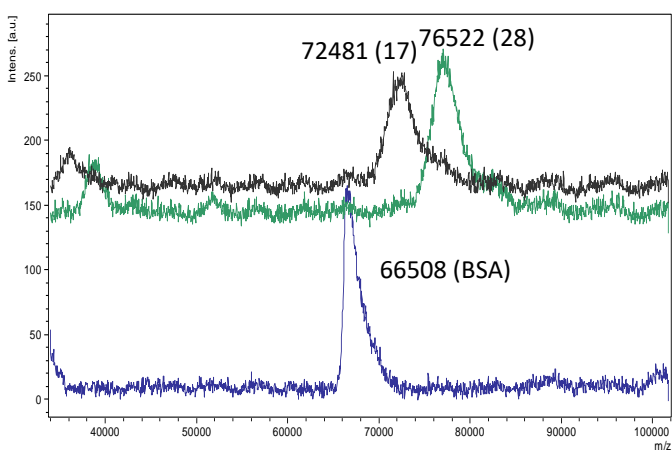

**Gal $\beta$ 3GlcNAc $\alpha$ -BSA**

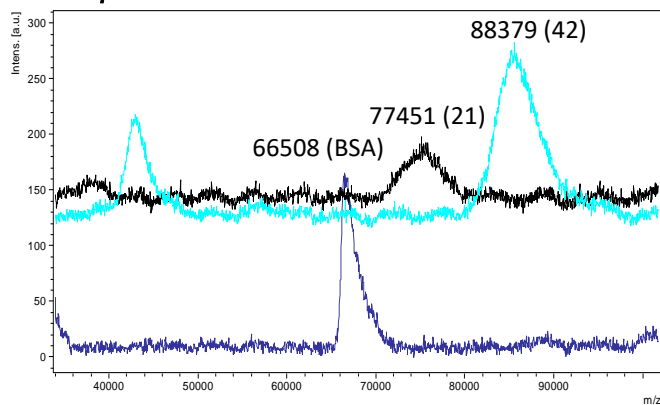

**Gal $\beta$ 3GlcNAc $\beta$ -BSA**

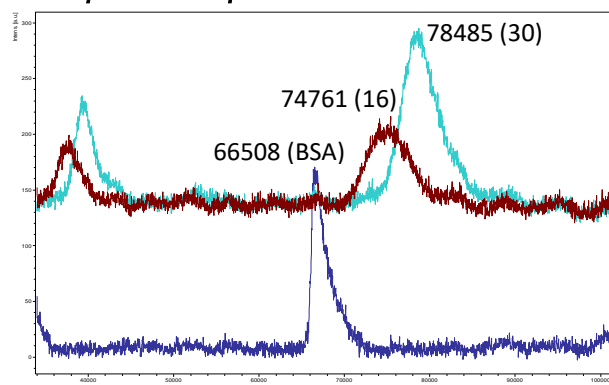

**Gal $\beta$ 3GalNAc $\beta$ -BSA**

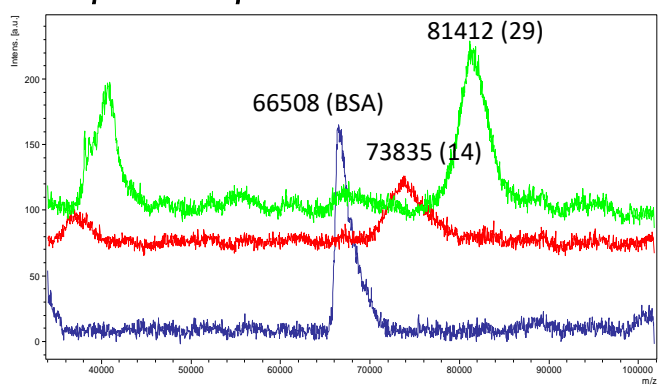

**Gal $\beta$ 3GalNAc $\alpha$ -BSA**

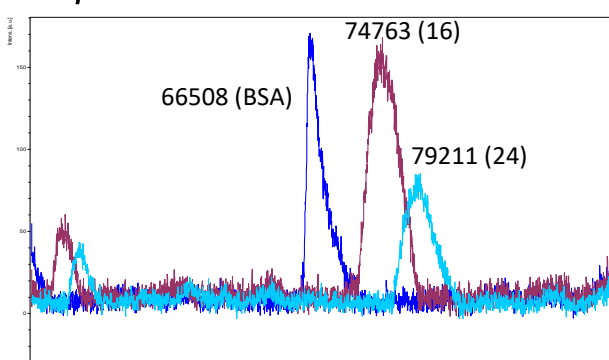

**Lac $\beta$ -BSA**

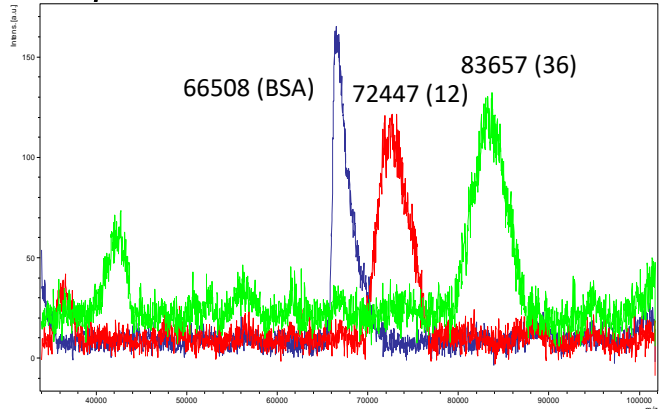

**LacNAc $\beta$ -BSA**

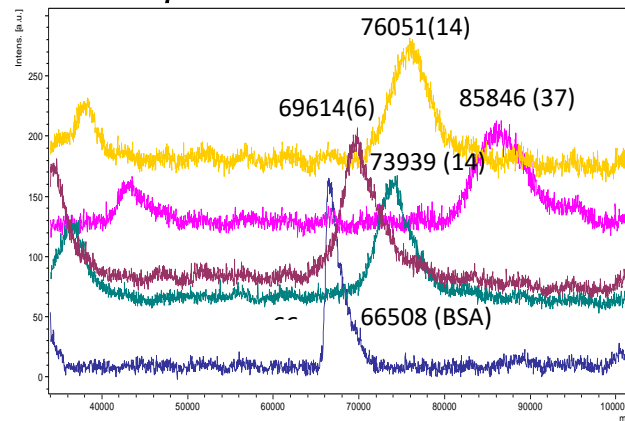

**Gal $\alpha$ 3Lac $\beta$ -BSA (iGb3)**

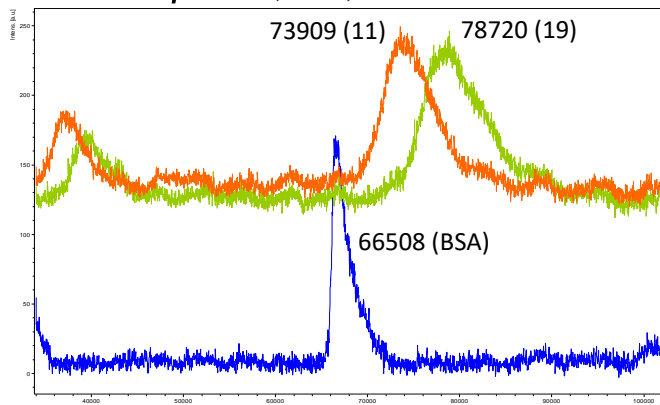

**Gal $\alpha$ 3LacNAc $\beta$ -BSA**

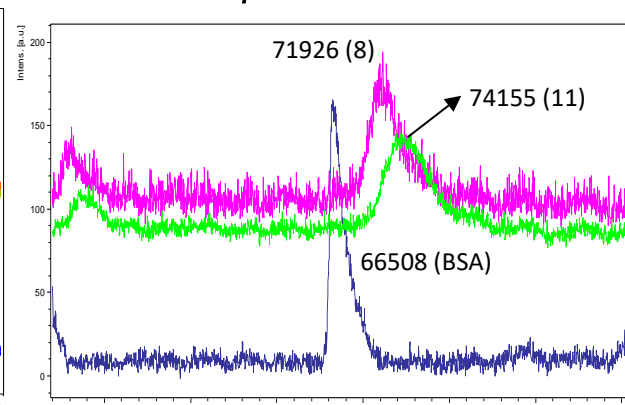

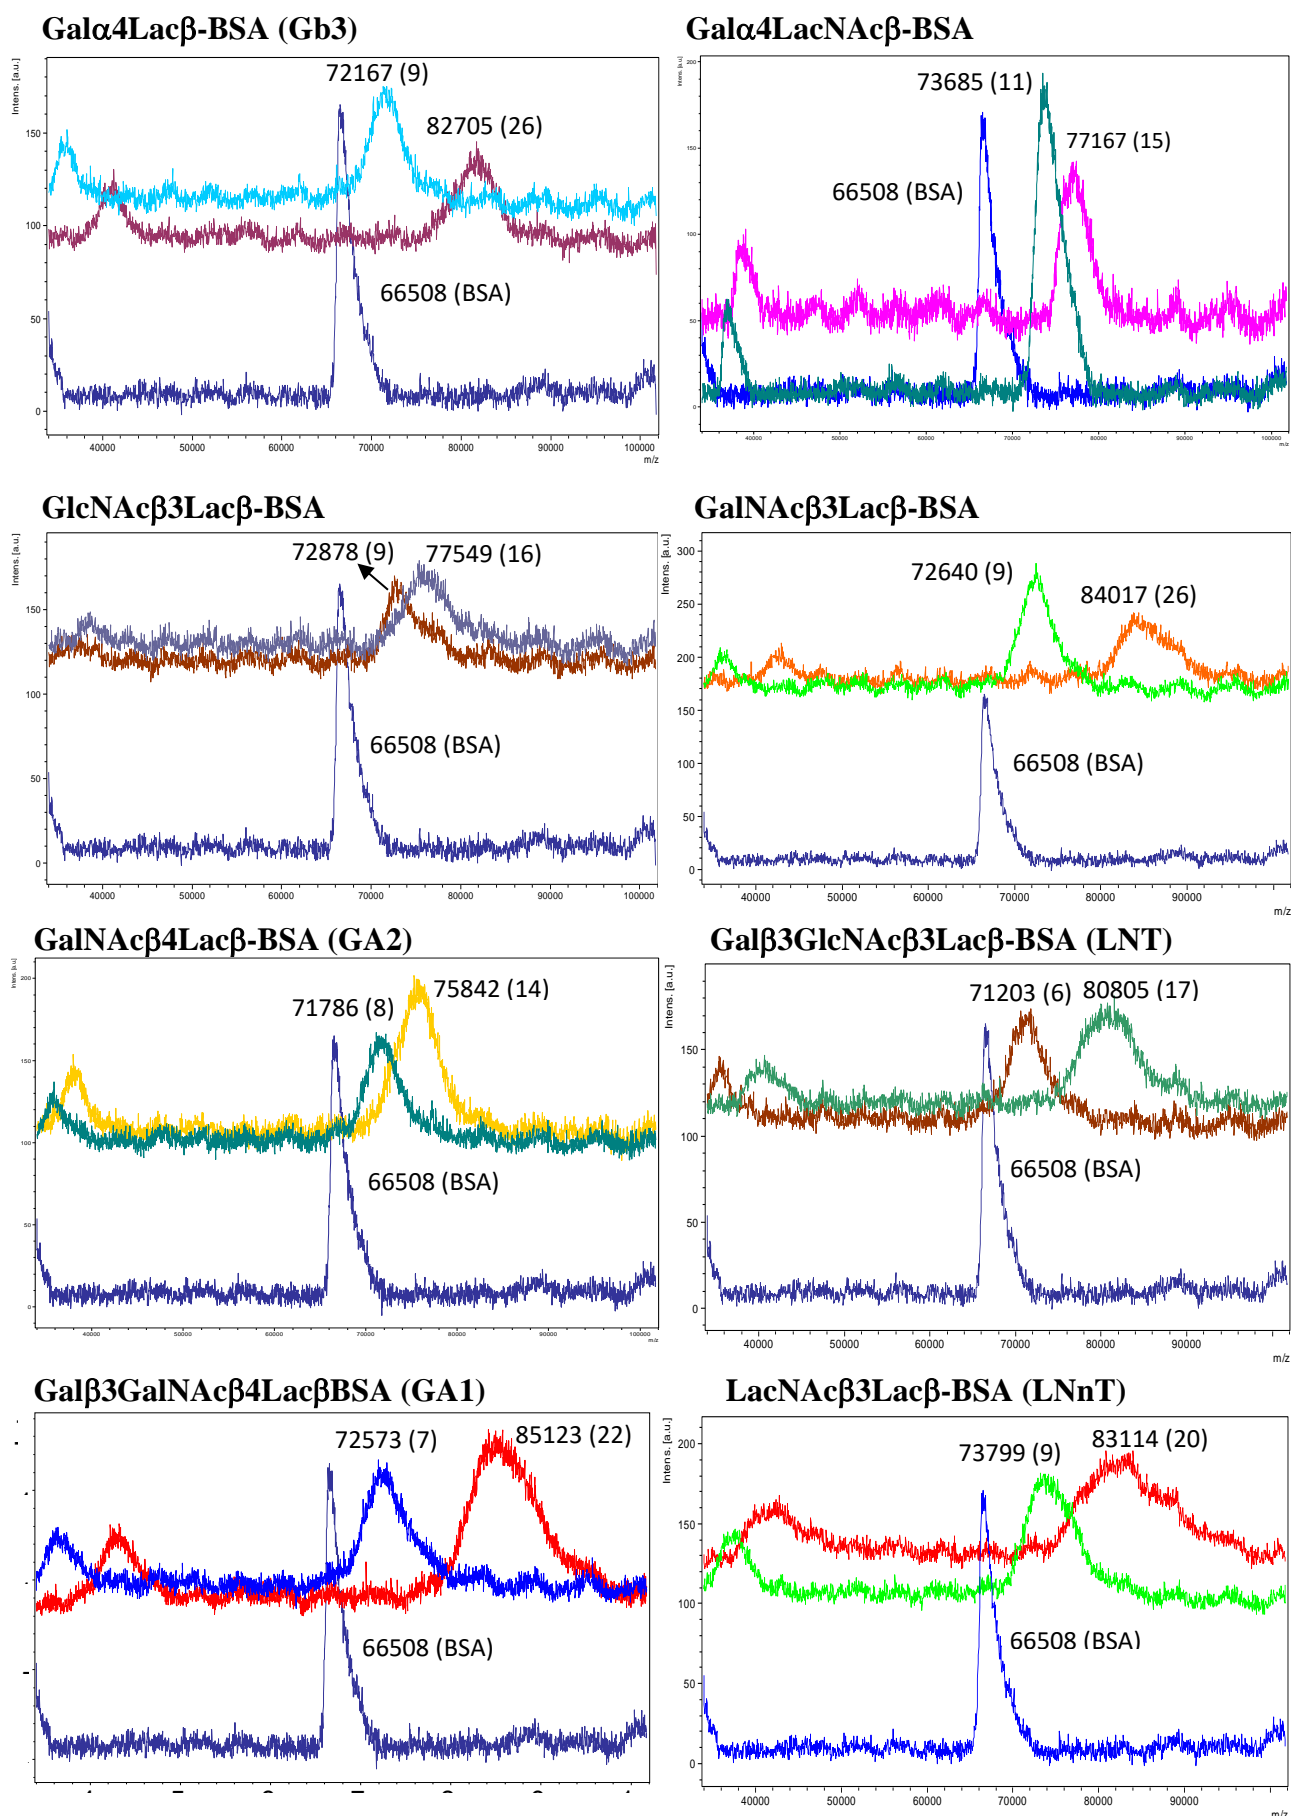

**Figure S2.** MALDI-TOF analysis results of glycan-BSA conjugates which were used to calculate the average numbers of glycans per BSA molecule (glycan valencies, the numbers shown in parentheses).

600 MHz  $^1\text{H}$  and 150 MHz  $^{13}\text{C}\{^1\text{H}\}$  NMR spectra of Glc $\alpha$ PropN $_3$  (**1**) in D $_2$ O

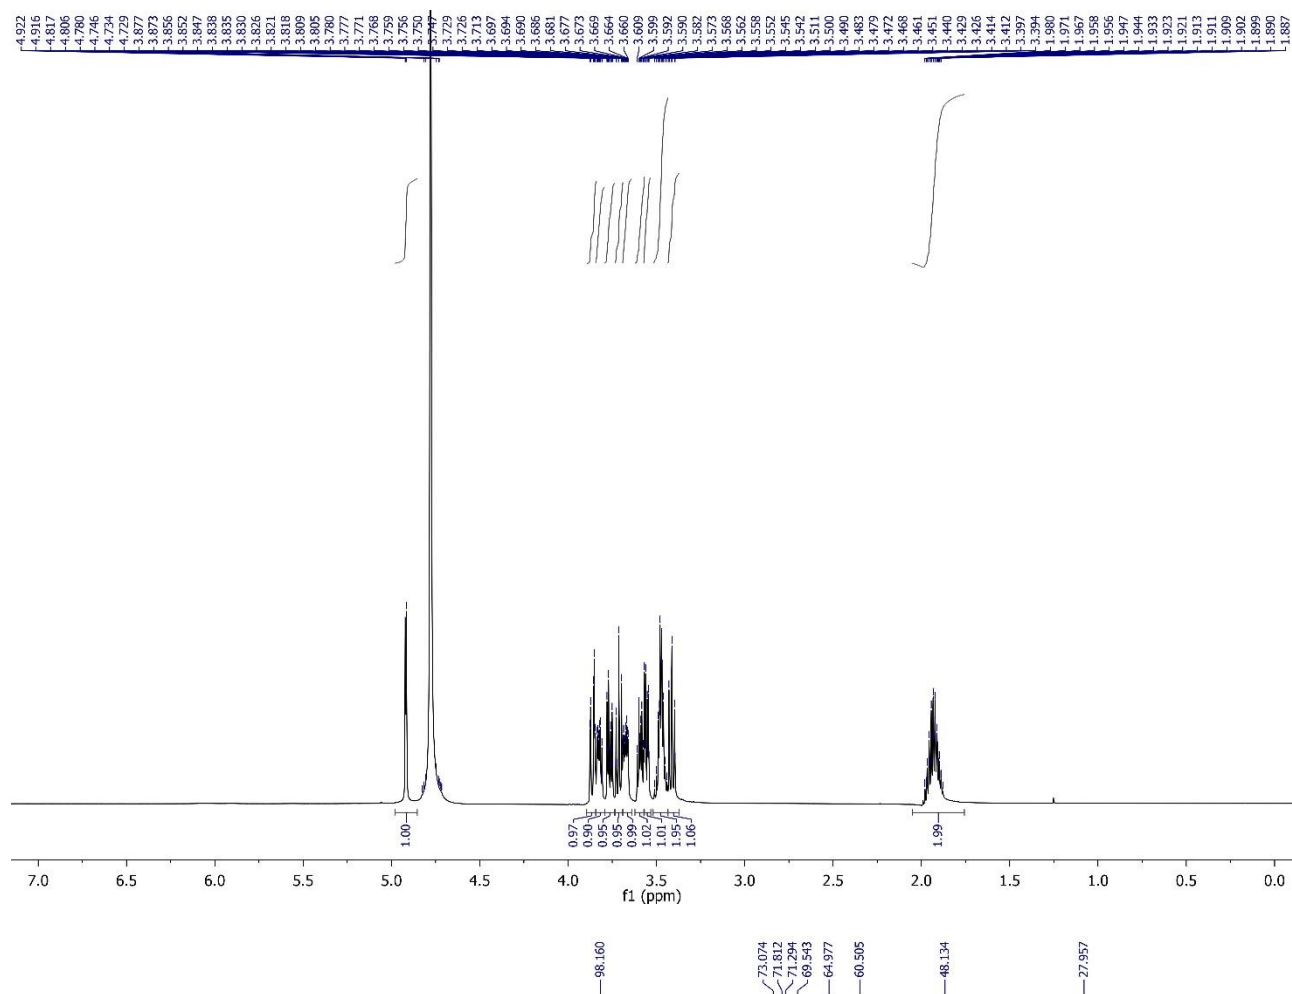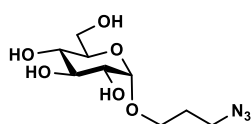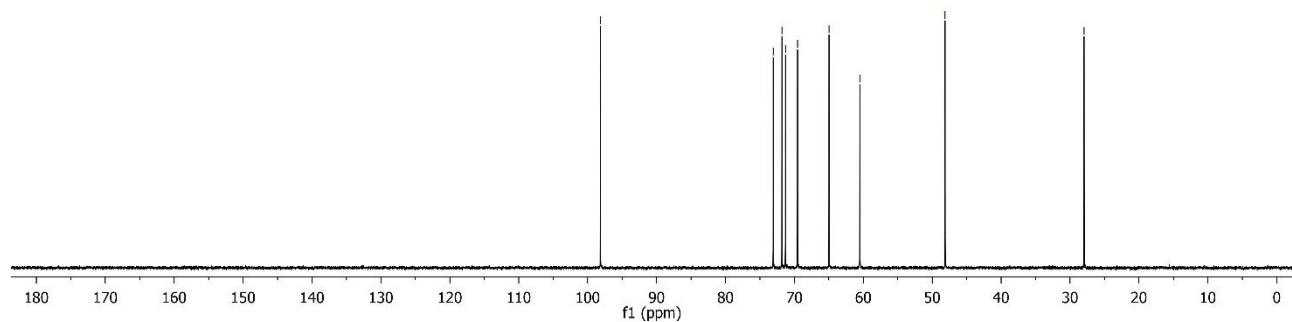



800 MHz  $^1\text{H}$  and 200 MHz  $^{13}\text{C}\{^1\text{H}\}$  NMR spectra of Glc $\beta$ PropN $_3$  (**2**) in D $_2$ O

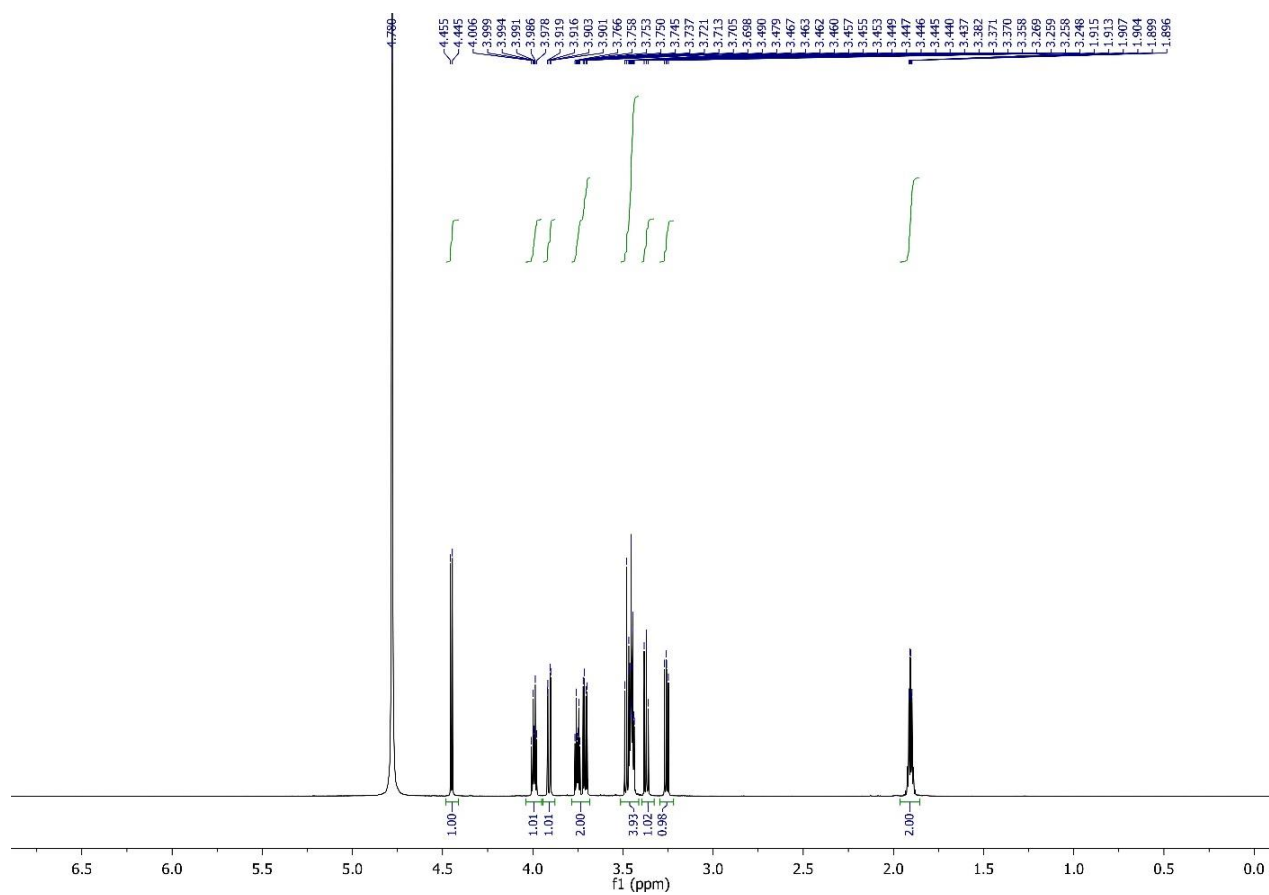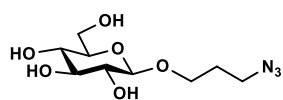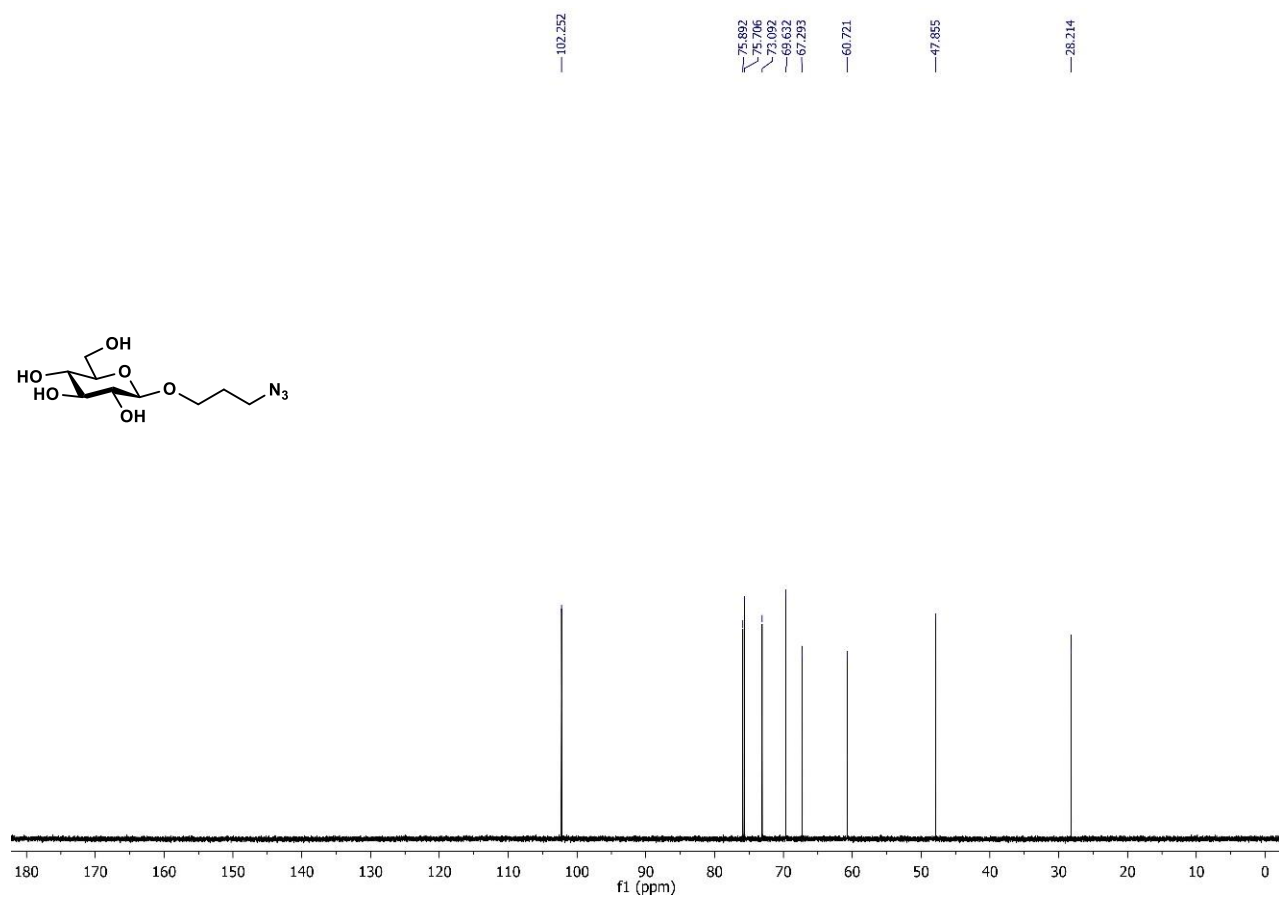

<sup>1</sup>H NMR spectrum of compound 10b in CDCl<sub>3</sub>. The spectrum shows peaks at 4.937, 4.932, 4.816, 4.763, 4.751, 3.971, 3.966, 3.931, 3.924, 3.916, 3.858, 3.854, 3.845, 3.841, 3.826, 3.817, 3.819, 3.814, 3.806, 3.801, 3.797, 3.737, 3.735, 3.728, 3.593, 3.585, 3.580, 3.578, 3.572, 3.572, 3.565, 3.467, 3.454, 3.446, 3.439, 1.964, 1.945, 1.936, 1.925, 1.927, 1.925, 1.920, 1.916, 1.908, 1.899, 1.893, 1.892, and 1.890 ppm. Integration values are 1.00, 0.94, 0.92, 0.92, 1.01, 1.96, and 2.20.

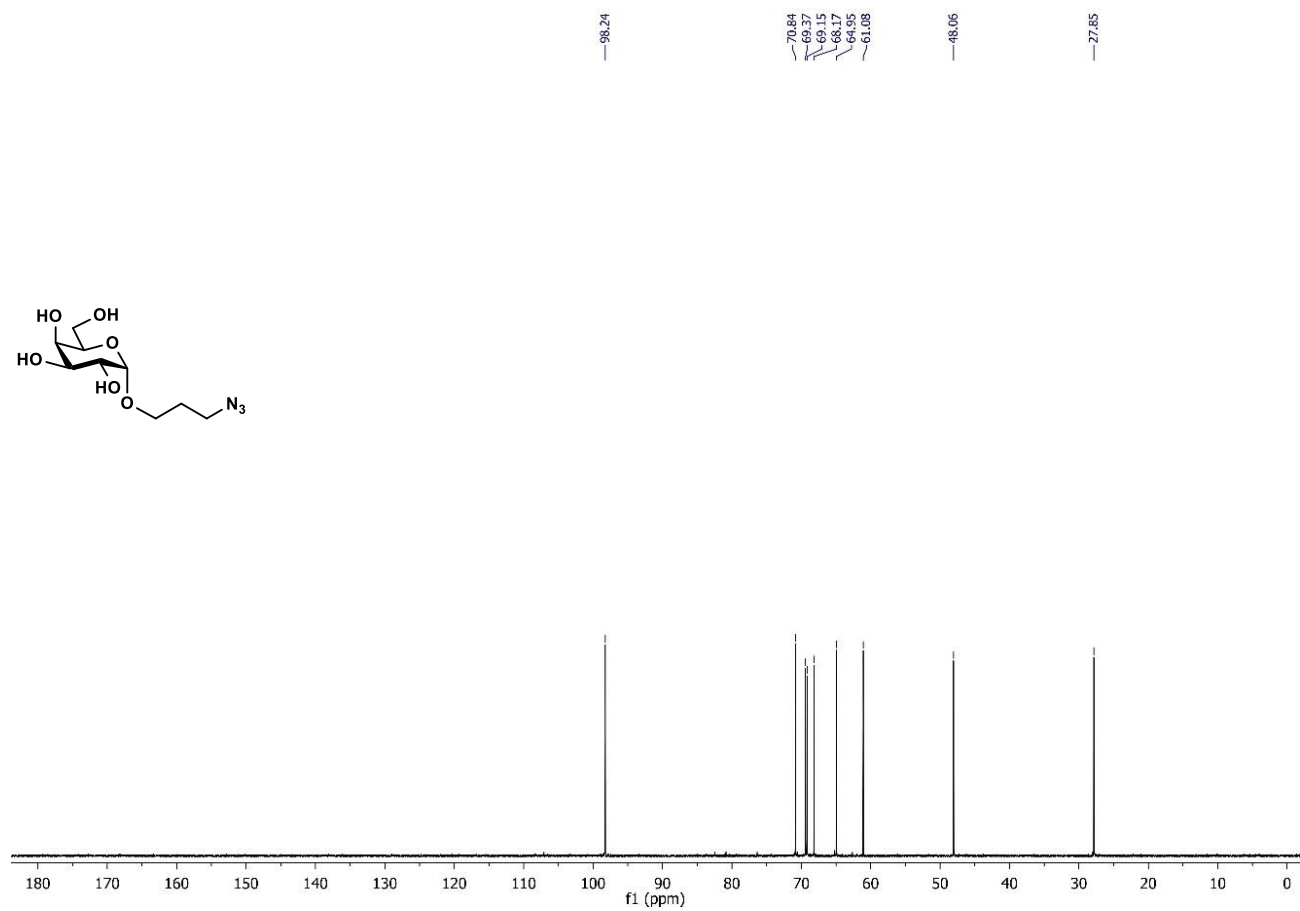

800 MHz  $^1\text{H}$  and 200 MHz  $^{13}\text{C}\{^1\text{H}\}$  NMR spectra of Gal $\alpha$ 3Lac $\beta$ PropN $_3$  (**15**) in D $_2$ O

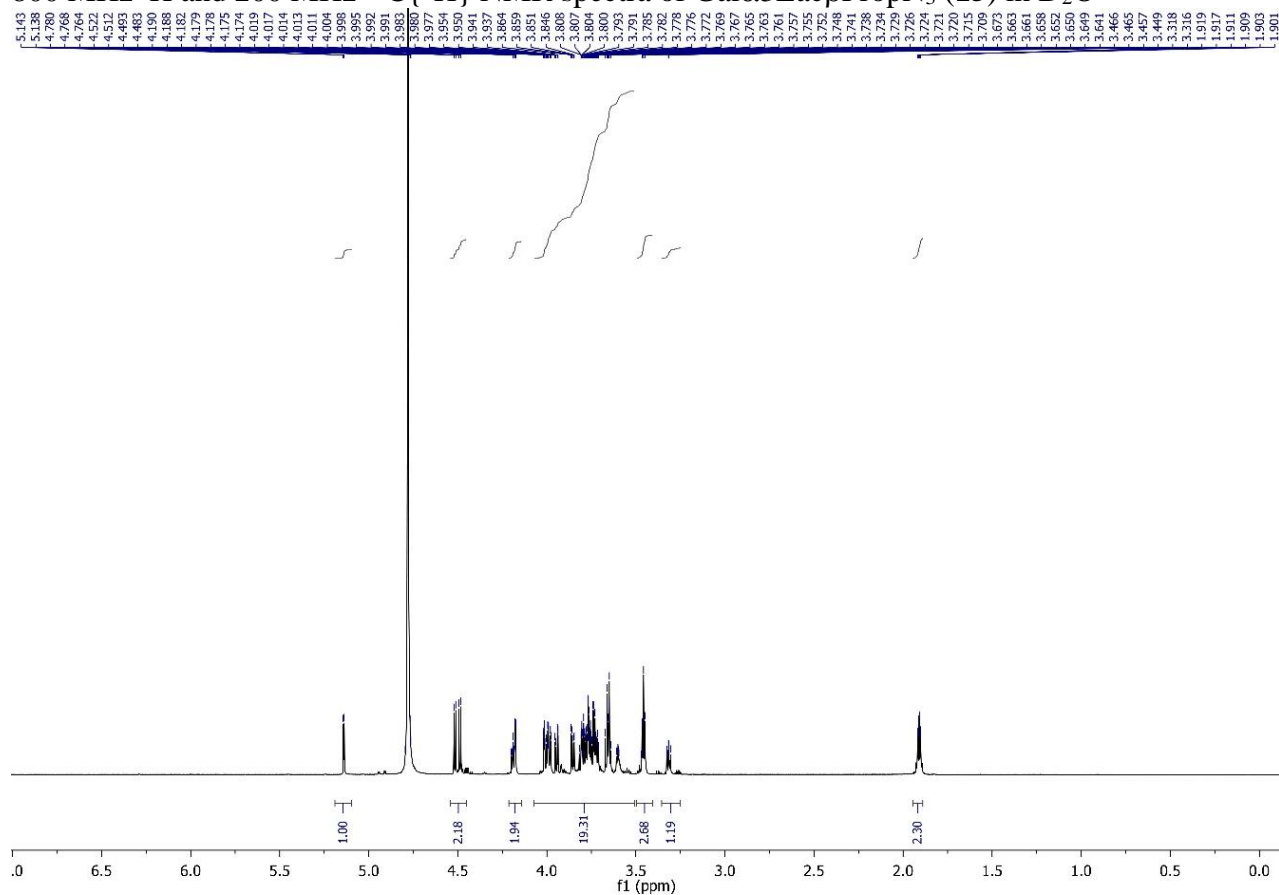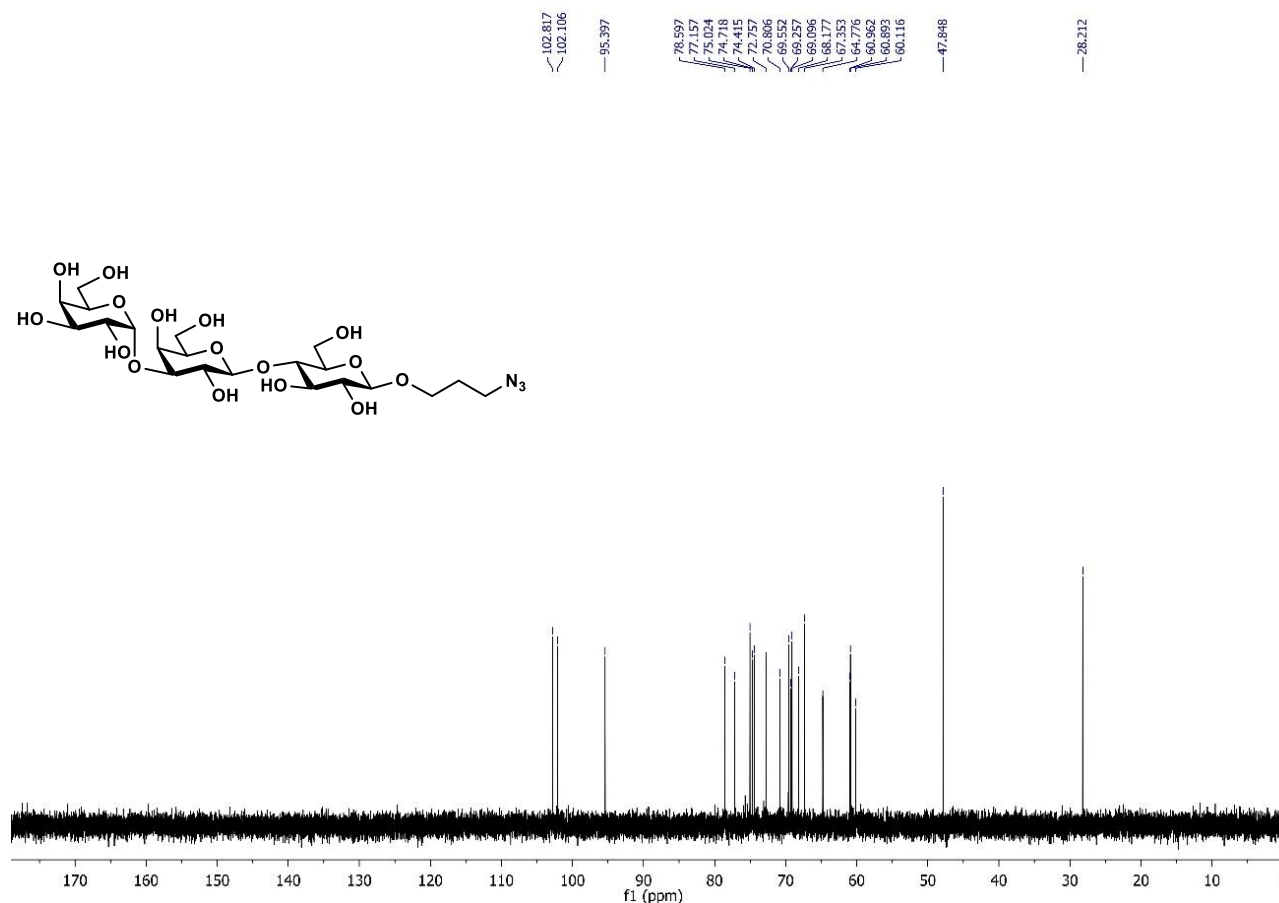

600 MHz  $^1\text{H}$  and 150 MHz  $^{13}\text{C}\{^1\text{H}\}$  NMR spectra of Gal $\alpha$ 3LacNAc $\beta$ PropN $_3$  (**16**) in D $_2$ O

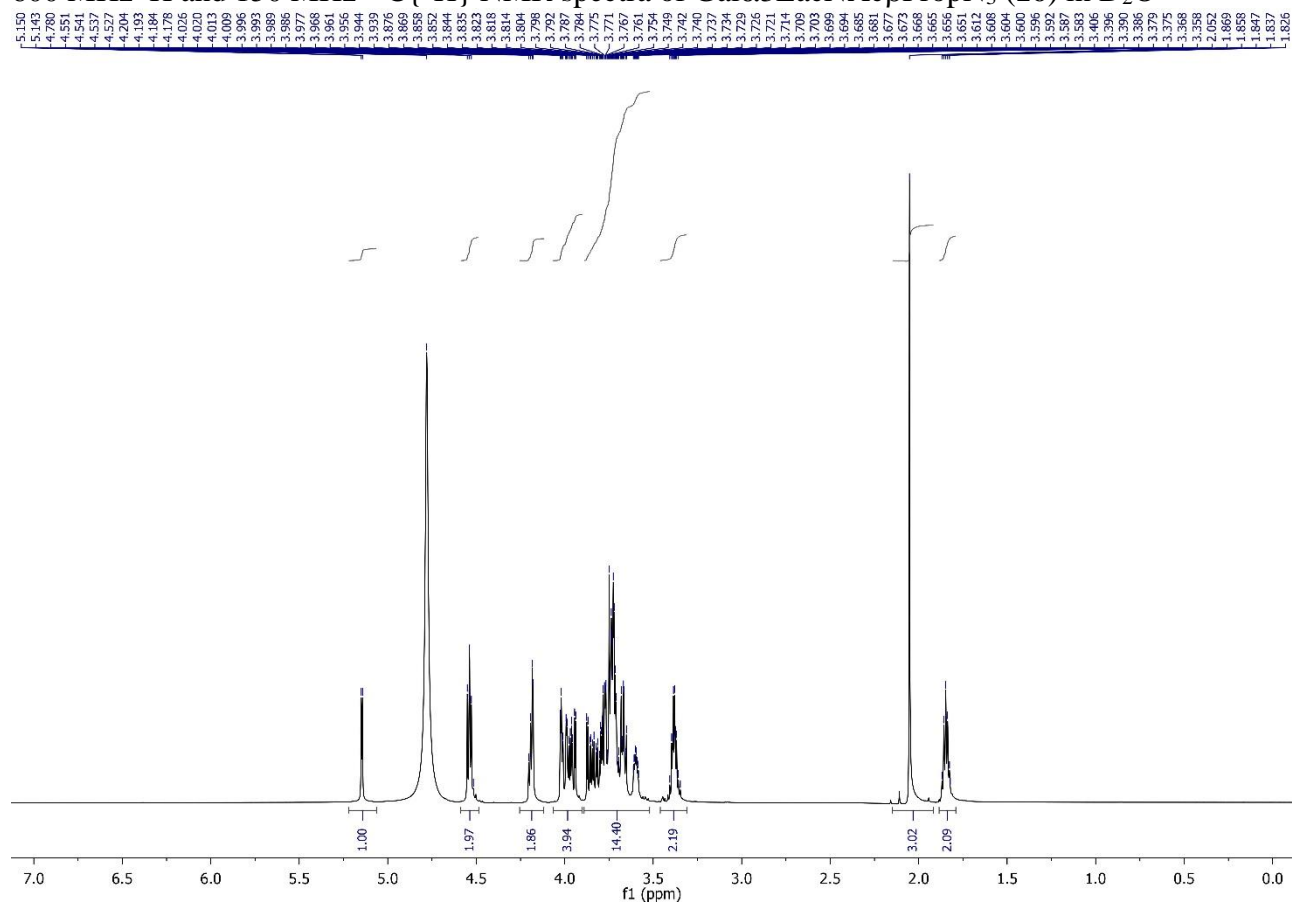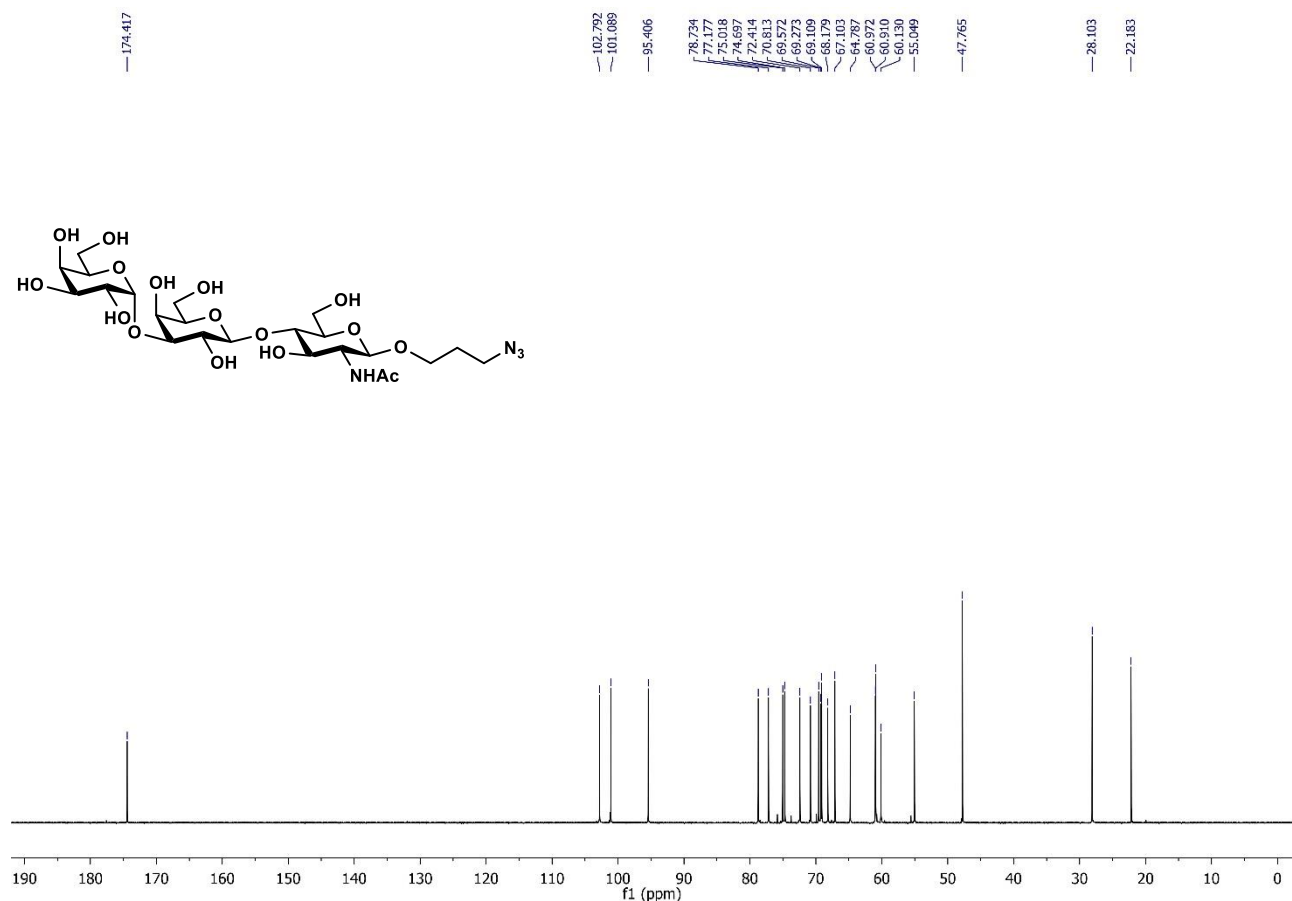

800 MHz  $^1\text{H}$  and 200 MHz  $^{13}\text{C}\{^1\text{H}\}$  NMR spectra of Gal $\alpha$ 4Lac $\beta$ PropN $_3$  (**17**) in D $_2$ O

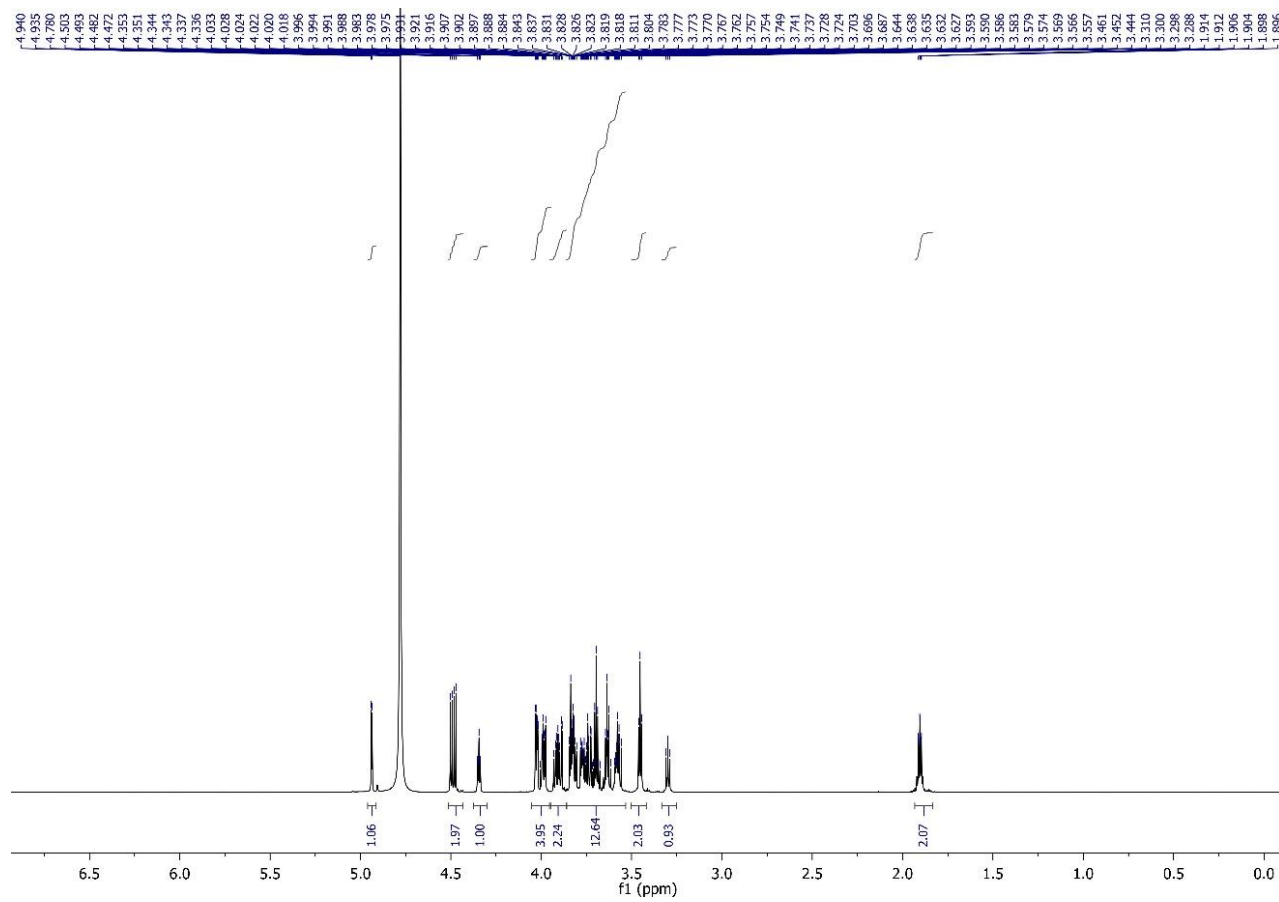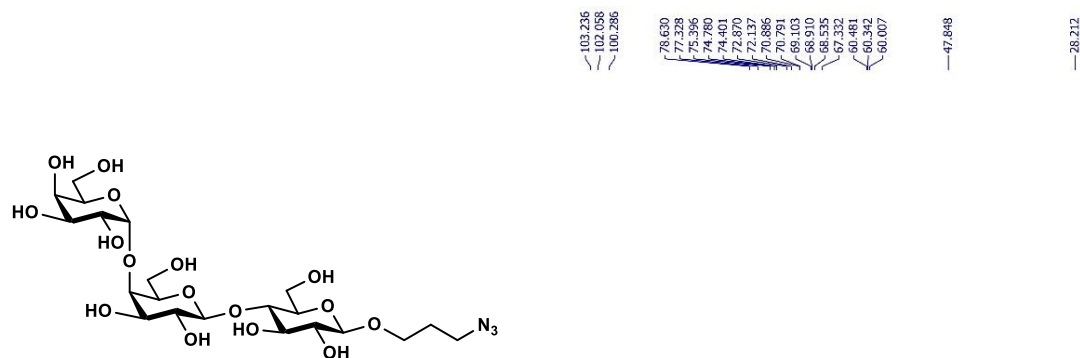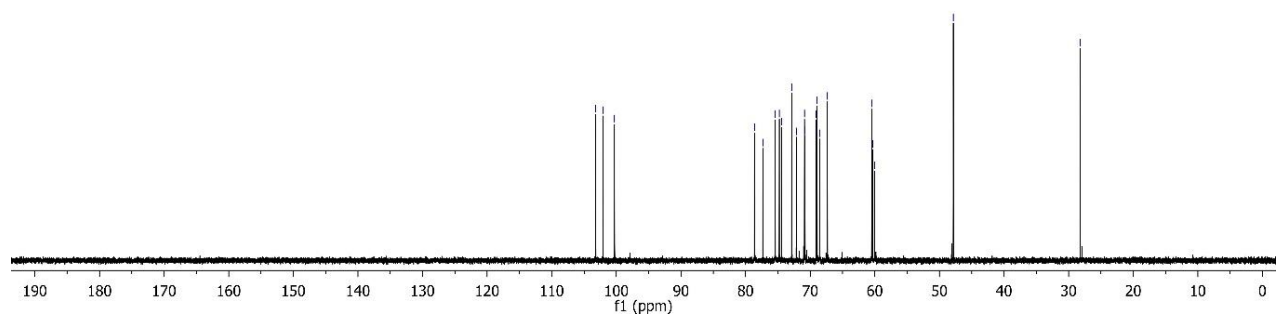

600 MHz  $^1\text{H}$  and 150 MHz  $^{13}\text{C}\{^1\text{H}\}$  NMR spectra of Gal $\alpha$ 4LacNAc $\beta$ PropN $_3$  (**18**) in D $_2$ O

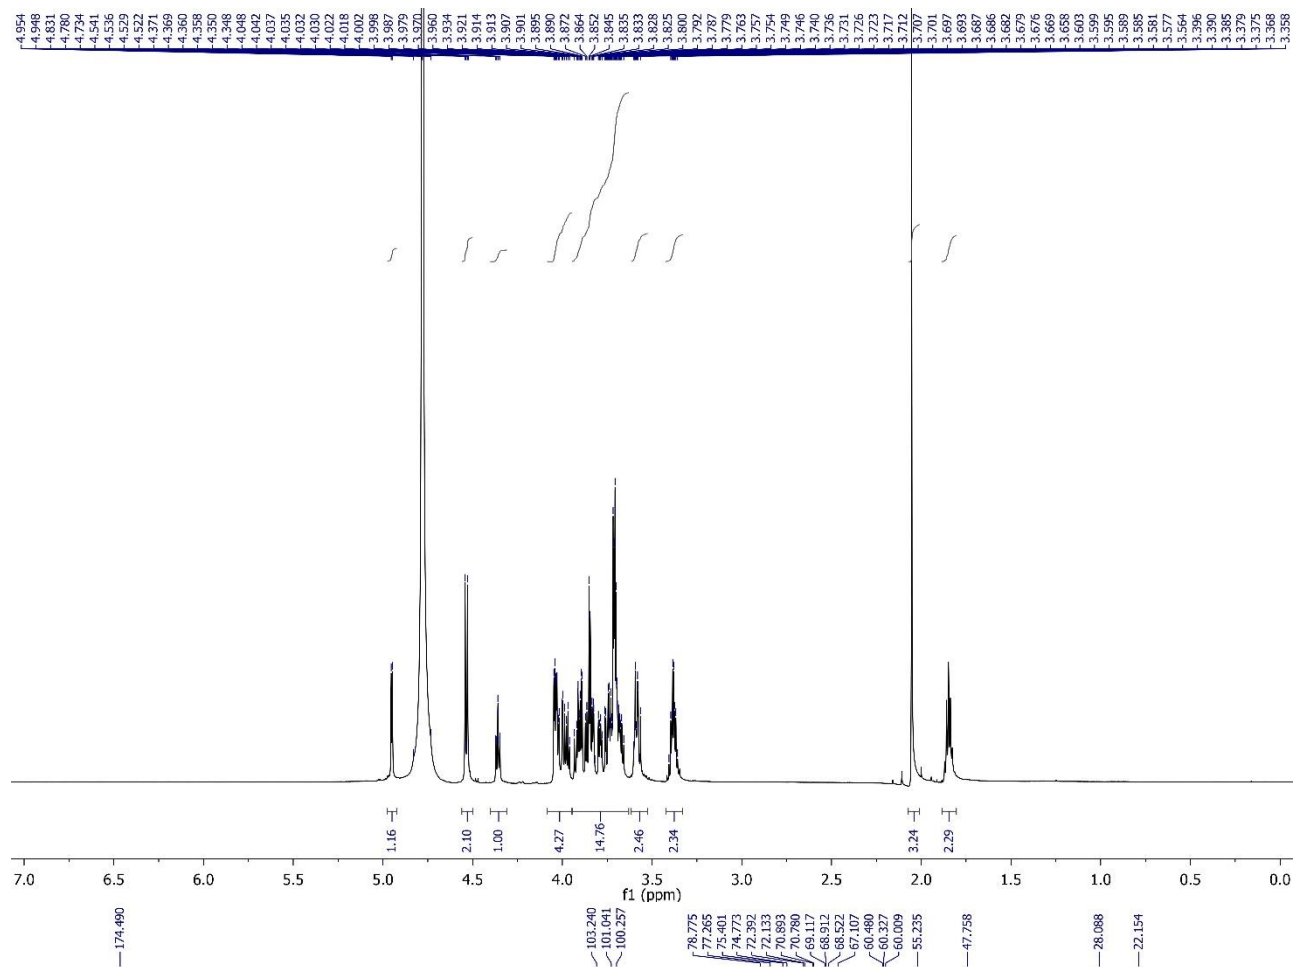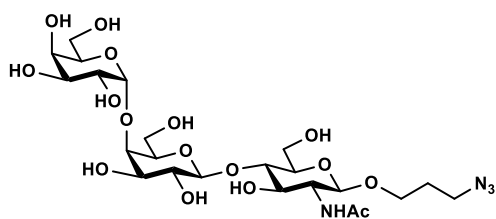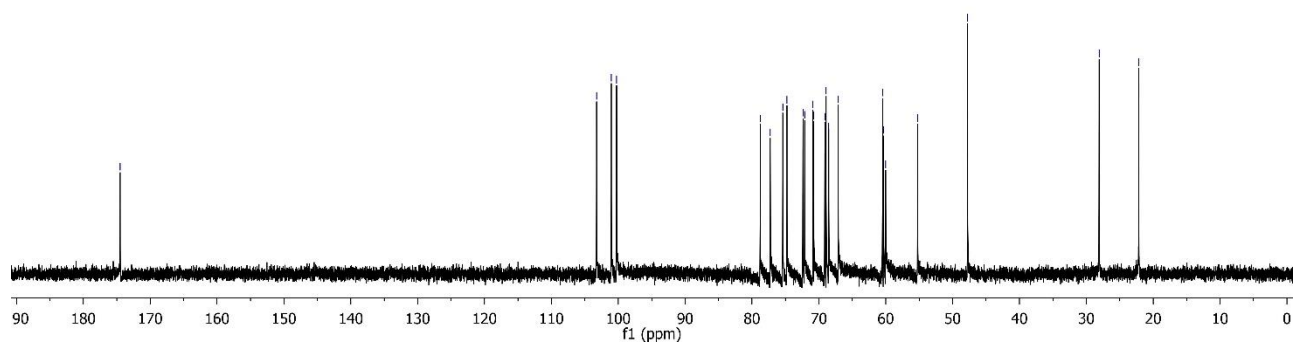

800 MHz  $^1\text{H}$  and 200 MHz  $^{13}\text{C}\{^1\text{H}\}$  NMR spectra of GalNAc $\beta$ 3Lac $\beta$ PropN $_3$  (**20**) in  $\text{D}_2\text{O}$

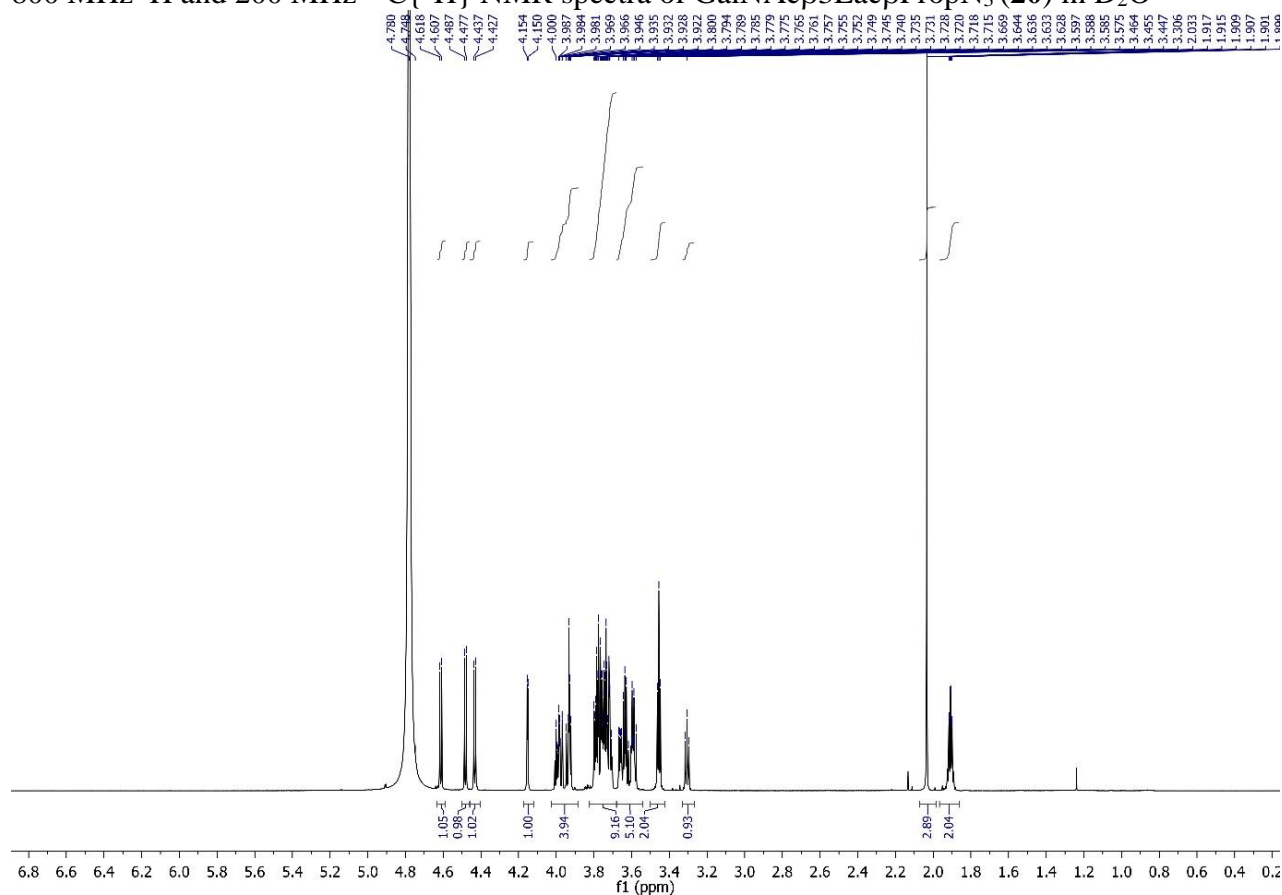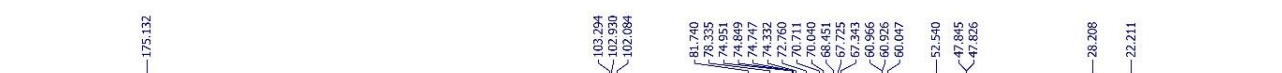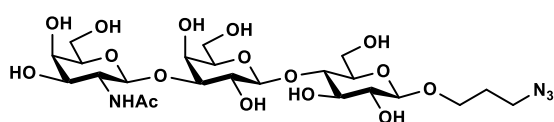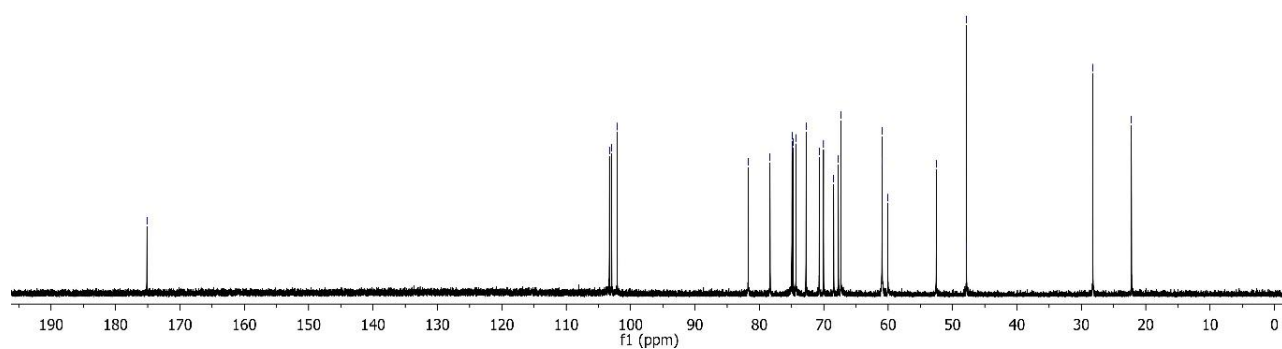

800 MHz  $^1\text{H}$  and 200 MHz  $^{13}\text{C}\{^1\text{H}\}$  NMR spectra of Gal $\beta$ 3GlcNAc $\beta$ 3Lac $\beta$ PropN $_3$  (LNT, **22**) in  $\text{D}_2\text{O}$

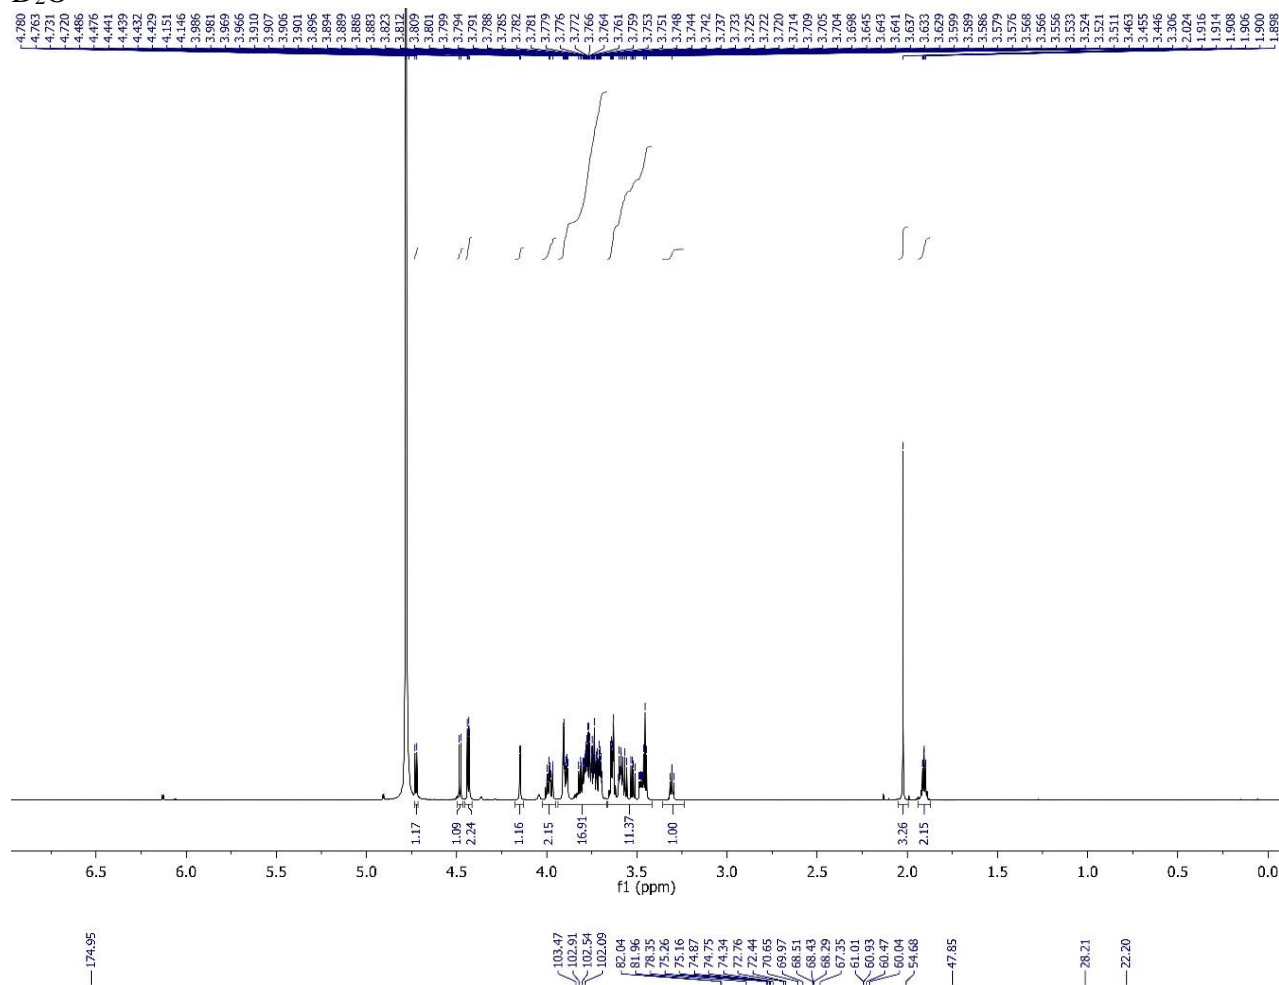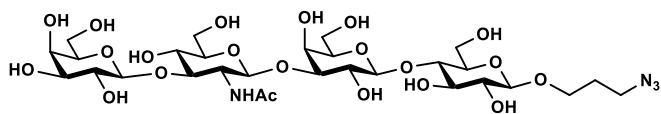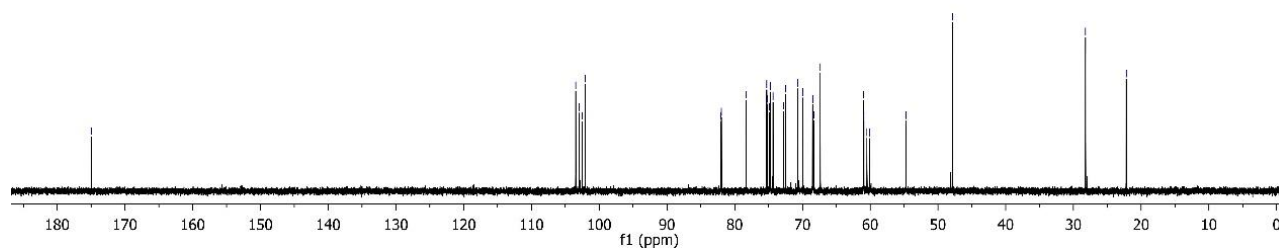

Supplement: s1 [file s1]
